# Supplementary material
Source: HighWire-hosted journal article supplement (https://openheart.bmj.com/content/8/1/e001650)
Supplement: inline-supplementary-material-1 [file inline-supplementary-material-1.pdf]

Supplemental Table 1: Reduced mortality in PCI-treated STEMI patients with contact-to-balloon times not exceeding 60 min and 120 min, respectively, compared with longer treatment times shown for different categories of symptom duration. Odds ratios and their corresponding 95% confidence intervals are given for the indicated four intervals from symptom onset to first medical contact (S2C).

| Variable             | Contact-to-balloon time (≤60 min vs >60 min) |             | Contact-to-balloon time (≤120 min vs >120 min) |             |
|----------------------|----------------------------------------------|-------------|------------------------------------------------|-------------|
|                      | Odds ratio                                   | 95%-CI      | Odds ratio                                     | 95%-CI      |
| Group 1 (S2C≤1h)     | 0.214                                        | 0.149–0.307 | 0.290                                          | 0.252–0.334 |
| Group 2 (1h<S2C≤2h)  | 0.564                                        | 0.353–0.901 | 0.332                                          | 0.247–0.446 |
| Group 3 (2h<S2C≤6h)  | 0.459                                        | 0.289–0.731 | 0.393                                          | 0.300–0.515 |
| Group 4 (6h<S2C≤24h) | 0.616                                        | 0.373–1.018 | 0.452                                          | 0.324–0.632 |

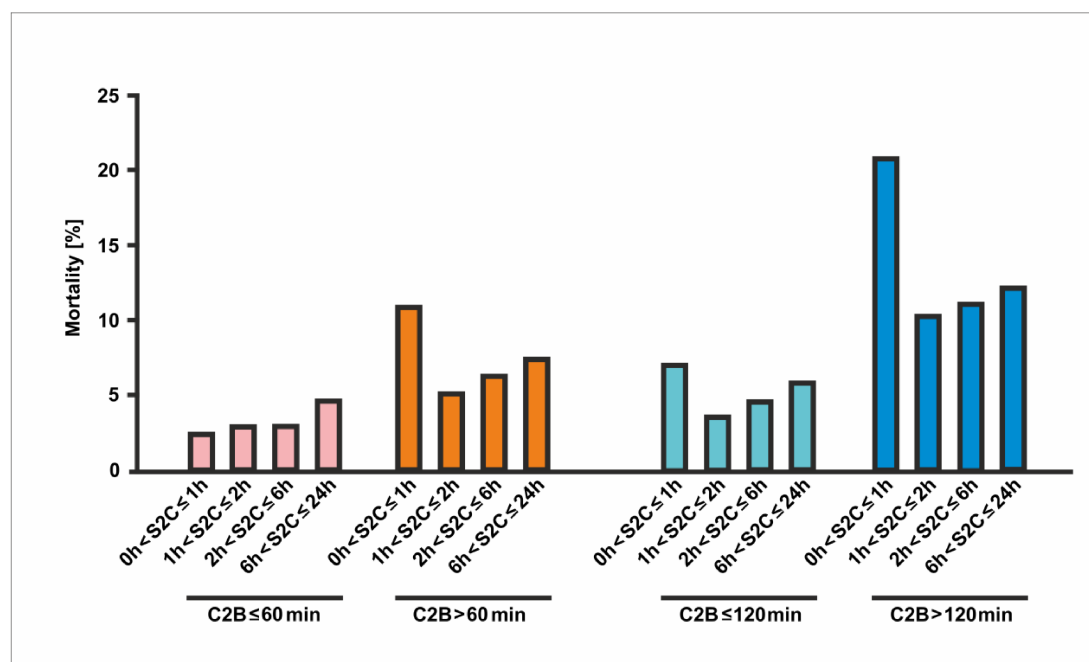

Supplemental Figure 1: Mortality of PCI-treated STEMI patients with different categories of time intervals from symptom onset to first medical contact (S2C) for the indicated contact-to-balloon times of ≤60 min versus >60 min and ≤120 min versus >120 min, respectively.
